# Supplementary material for: Improved cycling stability of NiS2 cathodes through designing a “kiwano” hollow structure
Source: Royal Society of Chemistry journal article supplement (doi:10.1039/c8ta01551a), 2018-01-01
Supplement: c8ta01551a1.pdf [file c8ta01551a1.pdf]

## Supporting Information

### Improved cycling stability of NiS<sub>2</sub> cathode through designing “kiwano” hollow structure

Yaru Zhang,<sup>a</sup> Fei Lu,<sup>a</sup> Pan Lu,<sup>a</sup> Yong Xu,<sup>b</sup> Yijun Yang,<sup>a</sup> Yoshio Bando,<sup>b,c</sup>

Dmitri Golberg,<sup>c,e</sup> Jiannian Yao<sup>b,d</sup> and Xi Wang<sup>a,b,\*</sup>

<sup>a</sup> Key Laboratory of Luminescence and Optical Information, Ministry of Education, Department of Physics, School of Science, Beijing Jiaotong University, Beijing, 100044, P. R. China

E-mail: [xiwang@bjtu.edu.cn](mailto:xiwang@bjtu.edu.cn)

<sup>b</sup> School of Chemical Engineering and Technology, Tianjin University; Institute of Molecular Plus, Tianjin University; Tianjin Key Laboratory of Molecular Optoelectronic Sciences, Department of Chemistry, Tianjin University; Collaborative Innovation Center of Chemical Science and Engineering (Tianjin), Tianjin, 300072, P. R. China

<sup>c</sup> International Center for Young Scientists (ICYS) & International Center for Materials Nanoarchitectonics (MANA), National Institute for Materials Science (NIMS), Namiki 1-1, Tsukuba, Ibaraki 305-0044, Japan

<sup>d</sup> Key Laboratory of Photochemistry, Institute of Chemistry, Chinese Academy of Sciences, Beijing, 100190, China

<sup>e</sup> Science and Engineering Faculty, Queensland University of Technology (QUT), 2 George St., Brisbane, QLD 4000, Australia

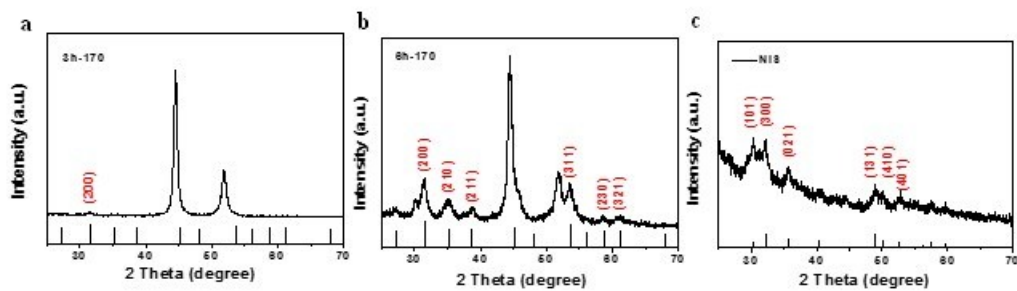

**Fig. S1** XRD patterns of NiS<sub>2</sub> samples at 170 °C with the different reaction time: (a) 3h and (b) 6 h. (c) XRD pattern of a phase-converted NiS from the initial NiS<sub>2</sub> after long cycles.

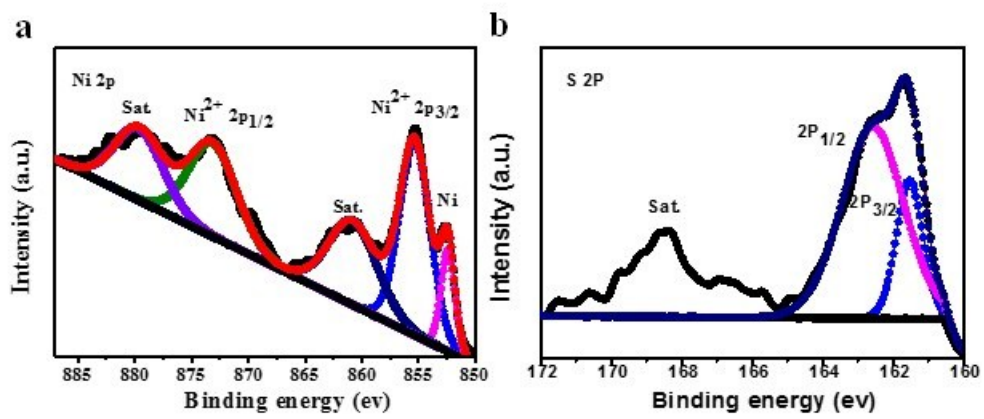

Fig. S2 (a-b) XPS profiles of Ni 2p and S 2p for NiS<sub>2</sub>.

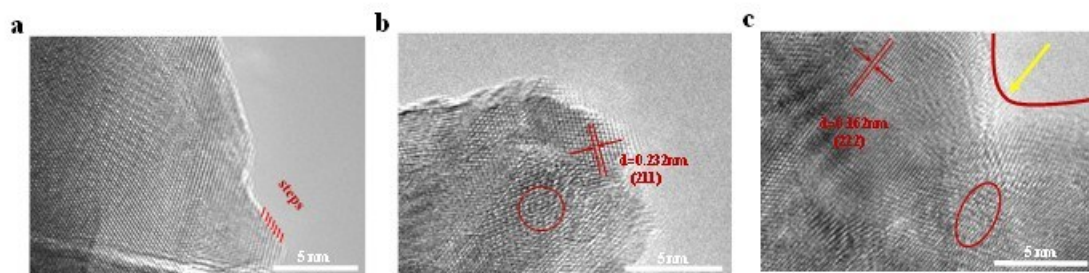

**Fig. S3** (a-c) HRTEM images of the NiS<sub>2</sub> hollow spheres.

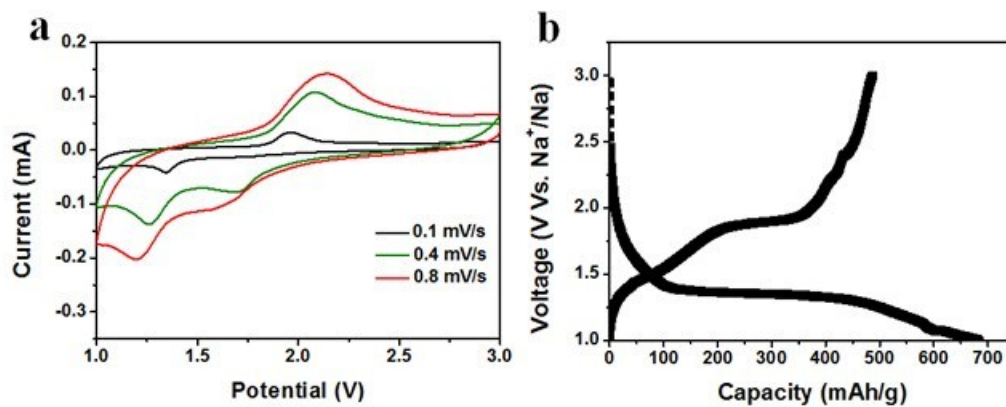

**Fig. S4** (a) CV curves of a NiS<sub>2</sub> electrode in the voltage window of 1.0–3.0 V at a scan rate of 0.1 mV/s, 0.4 mV/s and 0.8 mV/s after long cycles. (b) The galvanostatic charge/discharge profiles of a NiS<sub>2</sub> electrode in the voltage window of 1.0–3.0 V at 50 mA/g.

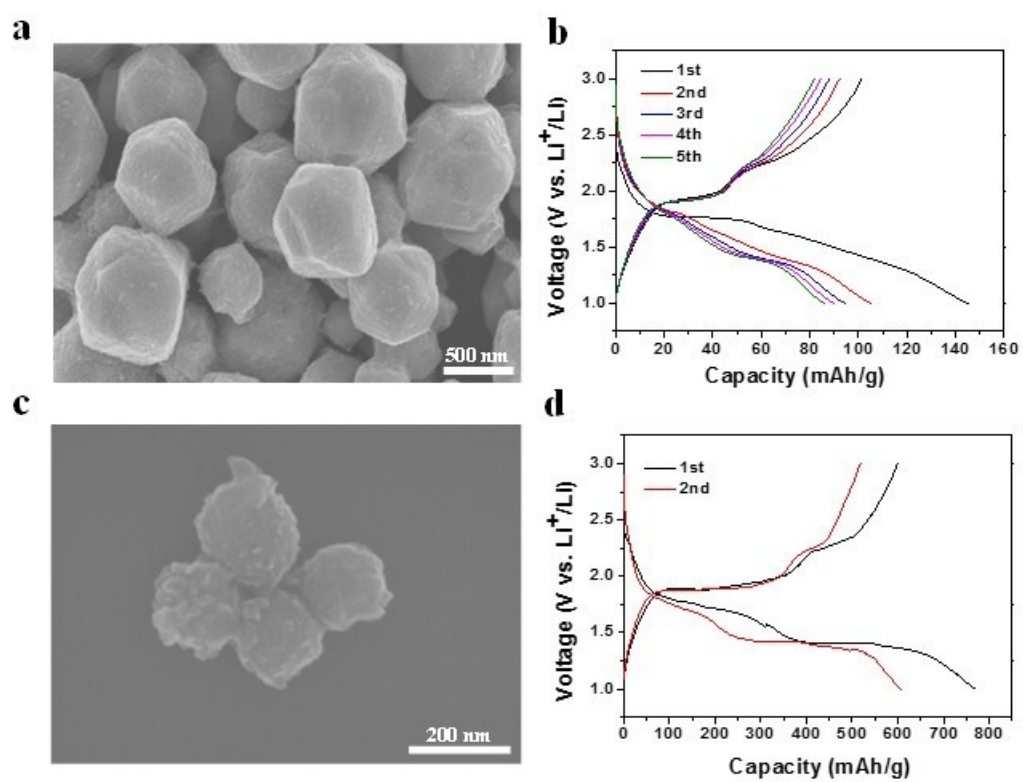

**Fig. S5** The SEM images and the galvanostatic charge/discharge profiles of NiS<sub>2</sub> samples prepared at 170 °C with the different reaction time: (a-b) 3 h and (c-d) 6 h.

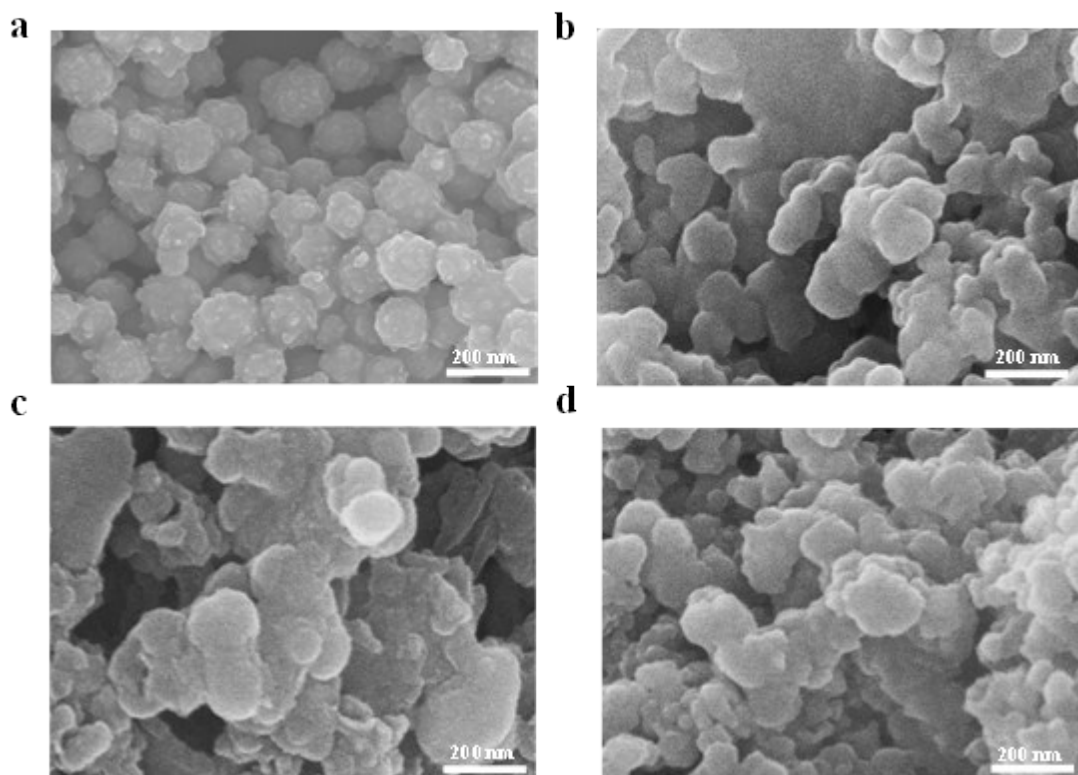

**Fig. S6** (a) SEM image of the NiS<sub>2</sub> hollow spheres before cycles. (b-d) SEM images of a NiS<sub>2</sub> electrode material after 10, 50, 100 cycles.

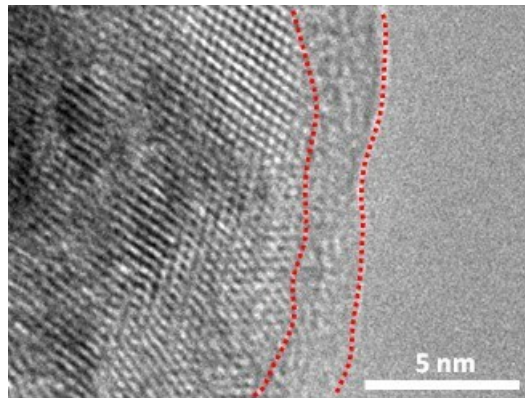

**Fig. S7** HRTEM image of the NiS<sub>2</sub> surface after first lithiation.



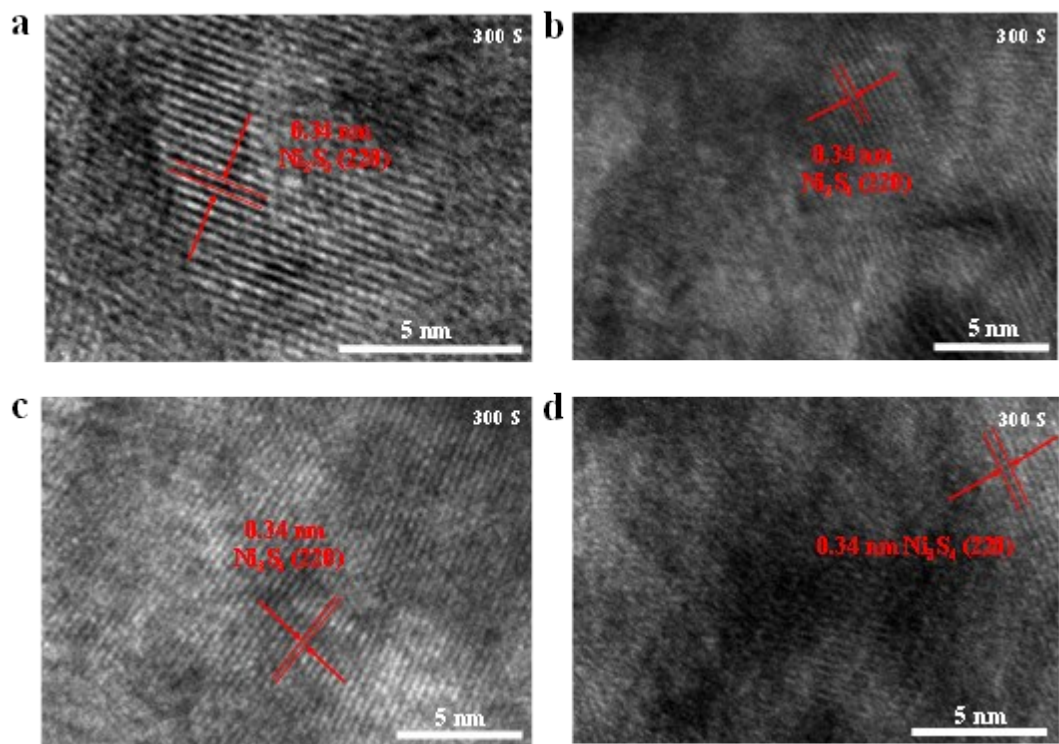

**Fig. S8** HRTEM images of the different lithiated  $\text{NiS}_2$  particles after the first lithiation for 300 s as observed via *in situ* TEM.

## Notes and references

1. Q. N. Chen, W. X. Chen, J. B. Ye, Z. Wang and J. Y. Lee, *J. Power Sources*, 2015, **294**, 51-58
2. K. Liang, K. Marcus, S. Zhang, L. Zhou, Y. Li, S. T. De Oliveira, N. Orlovskaya, Y.-H. Sohn and Y. Yang, *Adv. Energy Mater.*, 2017, **7**, 1701309.
3. G. J. An, C. G. Liu, Y. D. Hou, X. L. Zhang and Y. Q. Liu, *Mater. Lett.*, 2008, **62**, 2643-2646.
4. X. Wang, Q. H. Weng, X. Z. Liu, X. B. Wang, D. M. Tang, W. Tian, C. Zhang, W. Yi, D. Q. Liu, Y. Bando and D. Golberg, *Nano Lett.*, 2014, **14**, 1164-1171.
5. Y. Yang, D.-M. Tang, C. Zhang, Y. Zhang, Q. Liang, S. Chen, Q. Weng, M. Zhou, Y. Xue, J. Liu, J. Wu, Q. H. Cui, C. Lian, G. Hou, F. Yuan, Y. Bando, D. Golberg and X. Wang, *Energy Environ. Sci.*, 2017, **10**, 979-986.
6. J. H. Wang, Z. Cheng, J. L. Bredas and M. L. Liu, *J. Chem. Phys.*, 2007, **127**, 8.
